# Supplementary material for: Relationship between Δ40p53α, Δ133p53α, and p53β/γ isoforms and mitochondrial copy number, with clinical and pathological features in Mexican breast cancer patients
Source: Research Square preprint supplement (doi:10.21203/rs.3.rs-4259902/v1), 2024-04-29
Supplement: Supplementary file 1 [file 02d5a6860523466ef14bdd6f.docx]

**Table S1. Expression of p53 protein isoforms according to all clinical and pathological features of breast cancer samples**

|  |  | **Δ40p53α** | | | **Δ133p53α** | | | **p53β/γ** | | |
| --- | --- | --- | --- | --- | --- | --- | --- | --- | --- | --- |
| **Clinical Features** | **Frequency** | **BCT** | **NAT** | **P** | **BCT** | **NAT** | **P** | **BCT** | **NAT** | **P** |
| **Age (%;n)** | <50  (27%; n=25) | 0.31±0.3 | 0.36±0.4 | 0.29 | 0.51±0.5 | 0.33±0.3 | 0.05 | 0.36±0.38 | 0.35±0.38 | 0.98 |
| >50  (73%; n=66) | 0.26±0.3 | 0.33±0.4 | 0.08 | 0.49±0.43 | 0.27±0.3 | 0.0002* | 0.37±0.3 | 0.35±0.35 | 0.40 |
| **BMI**  **(%;n)** | Healthy weight  (14%; n=12) | 0.19±0.3 | 0.26±0.4 | 0.65 | 0.36±0.4 | 0.18±0.3 | 0.24 | 0.26±0.4 | 0.24±0.3 | 0.83 |
| Overweight  (48%; n=42) | 0.31±0.3 | 0.37±0.4 | 0.13 | 0.58±0.4 | 0.34±0.4 | 0.007* | 0.40±0.4 | 0.39±0.4 | 0.77 |
| Obese  (38%; n=37) | 0.26±0.3 | 0.32±0.4 | 0.22 | 0.45±0.4 | 0.26±0.3 | 0.01* | 0.36±0.4 | 0.33±0.3 | 0.54 |
| **Histological Subtype (%;n)**  **Histological subtypes (%;n)** | IDC I  (54%; n=48) | 0.51±0.2 | 0.62±0.3 | 0.0001* | 0.79±0.2 | 0.53±0.3 | 0.0001* | 0.68±0.2 | 0.65±0.2 | 0.10 |
| IDC II  (9%; n=8) | 0 | 0 | - | 0.58±0.4 | 0 | 0.002* | 0 | 0 | - |
| IDC III  (17%; n=16) | 0 | 0 | - | 0.11±0.3 | 0 | - | 0 | 0 | - |
| ILC I  (17%; n=17) | 0.04±0.1 | 0.04±0.2 | 1.00 | 0.05±0.2 | 0.04±0.2 | 1.00 | 0.04±0.2 | 0.04±0.1 | 1.00 |
| Other  (3%; n=2) | 0 | 0 | - | 0 | 0 | - | 0 | 0 | - |
| **Breast Cancer Stage**  **(%;n)** | IA  (17.58%; n=16) | 0.28±0.3 | 0.34±0.4 | 0.48 | 0.60±0.4 | 0.29±0.4 | 0.01* | 0.41±0.4 | 0.41±0.4 | 0.89 |
| IB  (6.59%; n=6) | 0.27±0.3 | 0.25±0.4 | 0.93 | 0.41±0.4 | 0.22±0.3 | 0.33 | 0.36±0.4 | 0.35±0.4 | 0.93 |
| IIA  (21.99%; n=20) | 0.33±0.4 | 0.28±0.3 | 0.37 | 0.48±0.4 | 0.31±0.3 | 0.06 | 0.37±0.4 | 0.36±0.4 | 0.77 |
| IIB  (14.28%; n=13) | 0.23±0.3 | 0.28±0.4 | 0.54 | 0.44±0.4 | 0.17±0.3 | 0.06 | 0.28±0.4 | 0.28±0.4 | 0.95 |
| IIIA  (25.27%; n=23) | 0.23±0.3 | 0.31±0.4 | 0.23 | 0.26±0.3 | 0.47±0.4 | 0.03* | 0.33±0.4 | 0.29±0.3 | 0.54 |
| IIIB  (4.40%; n=4) | 0.13±0.3 | 0.20±0.4 | 1.00 | 0.25±0.5 | 0.21±0.4 | 1.00 | 0.19±0.4 | 0.19±0.4 | 1.00 |
| IIIC  (5.49%; n=5) | 0.52±0.3 | 0.58±0.3 | 0.29 | 0.70±0.4 | 0.53±0.3 | 0.12 | 0.60±0.3 | 0.55±0.3 | 0.34 |
| IV  (4.40%; n=4) | 0.44±0.3 | 0.58±0.4 | 0.24 | 0.63±0.4 | 0.53±0.3 | 0.56 | 0.55±0.4 | 0.55±0.4 | 0.88 |
| **Haplogroup (%;n)** | A  (37.36%; n=34) | 0.31±0.3 | 0.39±0.4 | 0.07 | 0.63±0.4 | 0.34±0.4 | 0.0002* | 0.42±0.4 | 0.40±0.4 | 0.60 |
| B  (28.57%; n=26) | 0.27±0.3 | 0.35±0.4 | 0.20 | 0.45±0.4 | 0.27±0.3 | 0.02* | 0.37±0.4 | 0.35±0.3 | 0.56 |
| C  (15.38%; n=14) | 0.28±0.3 | 0.30±0.4 | 0.70 | 0.42±0.4 | 0.31±0.4 | 0.35 | 0.31±0.4 | 0.33±0.4 | 0.54 |
| D  (9.89%; n=9) | 0.21±0.3 | 0.24±0.3 | 0.75 | 0.39±0.5 | 0.20±0.3 | 0.31 | 0.34±0.4 | 0.28±0.3 | 0.59 |
| Non-Native American (8.79%; n=8) | 0.21±0.3 | 0.20±0.4 | 0.95 | 0.32±0.4 | 0.17±0.3 | 0.40 | 0.27±0.4 | 0.25±0.3 | 0.86 |
| **ER (%;n)** | Positive  (82.42%; n = 75) | 0.26±0.3 | 0.33±0.3 | 0.06 | 0.50±0.4 | 0.28±0.3 | 0.0001* | 0.34±0.3 | 0.36±0.4 | 0.52 |
| Negative  (17.58%; n= 16) | 0.32±0.3 | 0.37±0.4 | 0.39 | 0.49±0.4 | 0.30±0.3 | 0.07 | 0.42±0.4 | 0.41±0.4 | 0.68 |
| **PR (%;n)** | Positive  (75.82%; n = 69) | 0.26±0.3 | 0.32±0.4 | 0.08 | 0.50±0.4 | 0.27±0.3 | 0.0001* | 0.36±0.4 | 0.34±0.3 | 0.45 |
| Negative  (24.18%; n= 22) | 0.32±0.3 | 0.37±0.4 | 0.30 | 0.47±0.4 | 0.32±0.3 | 0.08 | 0.40±0.4 | 0.39±0.4 | 0.79 |
| **HER2 (%;n)** | Positive  (6.59%; n = 6) | 0.48±0.3 | 0.58±0.3 | 0.14 | 0.67±0.4 | 0.62±0.3 | 0.34 | 0.62±0.3 | 0.57±0.3 | 0.46 |
| Negative  (93.41%; n= 85) | 0.26±0.3 | 0.32±0.4 | 0.07 | 0.47±0.4 | 0.26±0.3 | 0.0001* | 0.36±0.4 | 0.34±0.3 | 0.50 |
| **HER3 (%;n)** | Positive  (4.40%; n = 4) | 0.30±0.4 | 0.37±0.4 | 0.88 | 0.64±0.4 | 0.38±0.4 | 0.30 | 0.34±0.4 | 0.35±0.4 | 0.88 |
| Negative  (95.60%; n= 87) | 0.27±0.3 | 0.33±0.4 | 0.05 | 0.49±0.4 | 0.28±0.3 | 0.0001* | 0.37±0.4 | 0.35±0.3 | 0.43 |
| **Breast cancer subtype (%;n)** | Luminal A  (75.82%; n = 69) | 0.26±0.3 | 0.32±0.4 | 0.08 | 0.48±0.4 | 0.27±0.3 | 0.0002* | 0.36±0.4 | 0.34±0.3 | 0.48 |
| Luminal B  (3.30%; n= 3) | 0.21±0.4 | 0.22±0.4 | 1.00 | 0.57±0.5 | 0.28±0.5 | 0.48 | 0.23±0.4 | 0.23±0.4 | 1.00 |
| TNBC  (13.18%; n= 12) | 0.28±0.3 | 0.31±0.4 | 0.73 | 0.44±0.5 | 0.21±0.3 | 0.13 | 0.36±0.4 | 0.36±0.4 | 0.95 |
| HER2+  (3.30%; n= 3) | 0.59±0.1 | 0.73±0.1 | 0.12 | 0.83±0.1 | 0.76±0.1 | 0.40 | 0.81±0.1 | 0.72±0.1 | 0.20 |
| HER3+  (4.40%; n= 4) | 0.37±0.4 | 0.37±0.4 | 0.88 | 0.64±0.4 | 0.38±0.4 | 0.30 | 0.34±0.4 | 0.33±0.4 | 0.89 |

Statistical differences were evaluated using a Mann-Whitney U test. BCT= Breast Cancer Tissue; NAT= Normal Adjacent Tissue; BMI= Body Mass Index; IDC= Invasive Ductal Carcinoma; ILC= Invasive Lobular Carcinoma; ER= Estrogen Receptor; PR= Progesterone Receptor; TNBC= Triple-Negative Breast Cancer; HER= Human Epidermal Growth Factor Receptor; *P value < 0.05 is considered significant
