# Supplementary material for: Relationship between Δ40p53α, Δ133p53α, and p53β/γ isoforms and mitochondrial copy number, with clinical and pathological features in Mexican breast cancer patients
Source: Research Square preprint supplement (doi:10.21203/rs.3.rs-4259902/v1), 2024-04-29
Supplement: Supplementary file 3 [file 9ad510e54565abdea4a47ee5.docx]

**Table S5.** **Comparison of mtDNAcn according to clinical and pathological features of breast cancer samples**

|  |  | **mtDNAcn** | | |
| --- | --- | --- | --- | --- |
| **Clinical and Pathological Features** | **Frequency** | **BCT** | **NAT** | **P** |
| **Age (%; n)** | <50 (27%; n=25) | 4.22±5.9 | 7.95±9.2 | 0.23 |
| >50 (73%; n=66) | 2.12±2.2 | 3.14±3.3 | 0.10 |
| **BMI (%; n)** | Healthy weight (14%; n=12) | 0.86±1.17 | 6.06±9.3 | 0.05 |
| Overweight (48%; n=42) | 3.48±4.3 | 3.66±4.8 | 0.83 |
| Obese (38%; n=37) | 2.36±3.40 | 5.03±6.1 | 0.05 |
| **Histological Type (%; n)** | IDC I (54%; n=48) | 3.43±4.7 | 3.93±5.6 | 0.75 |
| IDC II (9%; n=8) | 1.75±1.5 | 3.47±3.6 | 0.23 |
| IDC III (17%; n=16) | 2.10±2.4 | 3.31±4.5 | 0.81 |
| ILC I (17%; n=17) | 1.86±2.1 | 8.51±8.4 | 0.003* |
| Other (3%; n=2) | 1.14±1.6 | 0.03±0.04 | 0.89 |
| **Breast Cancer Stage (%; n)** | IA (17.58%; n=16) | 1.80±3.77 | 3.78±4.03 | 0.05 |
| IB (6.59%; n=6) | 2.50±2.1 | 3.77±3.7 | 0.82 |
| IIA (21.99%; n=20) | 4.57±5.9 | 3.99±6.1 | 0.68 |
| IIB (14.28%; n=13) | 2.60±2.4 | 6.84±6.0 | 0.60 |
| IIIA (25.27%; n=23) | 2.02±2.2 | 6.02±7.7 | 0.03* |
| IIIB (4.40%; n=4) | 1.53±2.3 | 1.09±1.4 | 1.00 |
| IIIC (5.49%; n=5) | 2.54±2.1 | 2.76±2.9 | 1.00 |
| IV (4.40%; n=4) | 2.70±1.6 | 1.56±1.4 | 0.40 |
| **Haplogroup (%; n)** | A (37.36%; n=34) | 0.31±0.3 | 0.39±0.4 | 0.07 |
| B (28.57%; n=26) | 0.27±0.3 | 0.35±0.4 | 0.20 |
| C (15.38%; n=14) | 0.28±0.3 | 0.30±0.4 | 0.70 |
| D (9.89%; n=9) | 0.21±0.3 | 0.24±0.3 | 0.75 |
| Non-Native American (8.79%; n=8) | 0.21±0.3 | 0.20±0.4 | 0.95 |
| **ER (%; n)** | Positive (82.42%; n = 75) | 0.26±0.3 | 0.33±0.3 | 0.06 |
| Negative (17.58%; n= 16) | 0.32±0.3 | 0.37±0.4 | 0.39 |
| **PR (%; n)** | Positive (75.82%; n = 69) | 0.26±0.3 | 0.32±0.4 | 0.08 |
| Negative (24.18%; n= 22) | 0.32±0.3 | 0.37±0.4 | 0.30 |
| **HER2 (%;n)** | Positive (6.59%; n = 6) | 0.48±0.3 | 0.58±0.3 | 0.14 |
| Negative (93.41%; n= 85) | 0.26±0.3 | 0.32±0.4 | 0.07 |
| **HER3 (%; n)** | Positive (4.40%; n = 4) | 0.30±0.4 | 0.37±0.4 | 0.88 |
| Negative (95.60%; n= 87) | 0.27±0.3 | 0.33±0.4 | 0.05 |
| **Breast Cancer Subtype (%; n)** | Luminal A (75.82%; n = 69) | 0.26±0.3 | 0.32±0.4 | 0.08 |
| Luminal B (3.30%; n= 3) | 0.21±0.4 | 0.22±0.4 | 1.00 |
| TNBC (13.18%; n= 12) | 0.28±0.3 | 0.31±0.4 | 0.73 |
| HER2- (3.30%; n= 3) | 0.59±0.1 | 0.73±0.1 | 0.12 |
| HER3- (4.40%; n= 4) | 0.37±0.4 | 0.37±0.4 | 0.88 |

Statistical differences were evaluated using a Mann-Whitney U test. BCT= Breast Cancer Tissue; NAT= Normal Adjacent Tissue; BMI= Body Mass Index; IDC= Invasive Ductal Carcinoma; ILC= Invasive Lobular Carcinoma; ER= Estrogen Receptor; PR= Progesterone Receptor; TNBC= Triple-Negative Breast Cancer; HER= Human Epidermal Growth Factor Receptor; P= P value; *P value < 0.05 is considered significant
