# Supplementary material for: Relationship between Δ40p53α, Δ133p53α, and p53β/γ isoforms and mitochondrial copy number, with clinical and pathological features in Mexican breast cancer patients
Source: Research Square preprint supplement (doi:10.21203/rs.3.rs-4259902/v1), 2024-04-29
Supplement: Supplementary file 4 [file c1be5fa31bbfbacc27a85415.docx]

**Table S3.** **Comparison of all clinical features, protein expression of p53 isoforms, and mtDNAcn according to specific and non-specific haplogroups of women with breast cancer**

|  | **A** | **Non-A** | **P** | **B** | **Non-B** | **P** | **C** | **Non-C** | **P** | **D** | **Non-D** | **P** | **Non-NA** | **Native American** | **P** |
| --- | --- | --- | --- | --- | --- | --- | --- | --- | --- | --- | --- | --- | --- | --- | --- |
| **Age (Years)** | 59.62±10.1 | 54.39±9.6 | 0.02* | 54.58±8.9 | 57.05±10.5 | 0.34 | 54±13 | 57±9.4 | 0.52 | 53±6.4 | 57±10 | 0.14 | 57±8.1 | 56±10 | 0.87 |
| **BMI (Kg/m2)** | 31±5.2 | 29±4.3 | 0.07 | 30±4.8 | 29±4.7 | 0.87 | 26±3.6 | 30±4.7 | 0.006* | 29.39±3.2 | 29.52±4.9 | 0.86 | 28.88±4.1 | 29.57±4.8 | 0.98 |
| **Weight (Kg)** | 73.24± 13.4 | 67.52±10.7 | 0.03* | 70.02±11.1 | 69.52±12.5 | 0.85 | 62.01±0.1 | 71.05±11.9 | 0.007* | 71±9.1 | 70±12 | 0.75 | 66.55±10.1 | 70.06±12.2 | 0.37 |
| **Hight (m)** | 1.59±0.1 | 1.53±0.06 | 0.16 | 1.53±0.1 | 1.54±0.1 | 0.75 | 1.53±0.1 | 1.54±0.1 | 0.37 | 1.55±0.0 | 1.53±0.1 | 0.56 | 1.51±0.1 | 1.54±0.06 | 0.10 |
| **Menarche (years)** | 12.38±1.2 | 12.65±1.5 | 0.51 | 12.42±1.4 | 12.60±1.4 | 0.62 | 13.64±1.4 | 12.35±1.2 | 0.006* | 12.00±1.2 | 12.61±1.4 | 0.27 | 12.38±1.3 | 12.57±1.4 | 0.69 |
| **Menopause (years)** | 49.61±4.8 | 49.05±4.1 | 0.60 | 49.14±3.3 | 49.34±4.8 | 0.83 | 50.00±1.9 | 49.19±4.6 | 0.64 | 47.29±7.9 | 49.49±3.9 | 0.65 | 49.43±2.9 | 49.26±4.5 | 0.68 |
| **mtDNAcn NAT** | 3.22±3.6 | 5.26±6.9 | 0.21 | 4.73±6.4 | 4.40±5.9 | 0.96 | 5.78±7.9 | 4.26±5.6 | 0.36 | 10.66±9.1 | 4.01±5.5 | 0.05 | 1.95±1.4 | 4.68±6.2 | 0.31 |
| **mtDNAcn BCT** | 3.58±4.6 | 2.21±3.1 | 0.06 | 1.97±2.3 | 2.94±4.2 | 0.28 | 1.07±1.3 | 3.94±3.9 | 0.03* | 6.290±5.8 | 2.42±3.4 | 0.05 | 1.11±1.4 | 2.82±3.9 | 0.18 |
| **Δ40p53 NAT** | 0.54±0.3 | 0.59±0.3 | 0.62 | 0.64±0.2 | 0.53±0.3 | 0.19 | 0.61±0.3 | 0.49±0.3 | 0.96 | 0.53±0.3 | 0.57±0.3 | 0.59 | 0.39±0.4 | 0.57±0.3 | 0.69 |
| **Δ40p53 BCT** | 0.42±0.3 | 0.50±0.2 | 0.19 | 0.50±0.2 | 0.44±0.2 | 0.65 | 0.55±0.2 | 0.41±0.3 | 0.13 | 0.46±0.3 | 0.46±0.2 | 0.75 | 0.41±0.3 | 0.46±0.2 | 0.50 |
| **Δ133p53 NAT** | 0.46±0.3 | 0.49±0.3 | 0.67 | 0.49±0.3 | 0.48±0.3 | 0.93 | 0.62±0.3 | 0.43±0.3 | 0.27 | 0.45±0.3 | 0.48±0.3 | 0.33 | 0.33±0.4 | 0.49±0.3 | 0.29 |
| **Δ133p53 BCT** | 0.85±0.1 | 0.81±0.1 | 0.45 | 0.84±0.1 | 0.83±0.2 | 0.50 | 0.83±0.1 | 0.83±0.1 | 0.87 | 0.87±0.1 | 0.83±0.1 | 0.69 | 0.64±0.4 | 0.85±0.1 | 0.62 |
| **p53** **β/γ NAT** | 0.54±0.3 | 0.63±0.2 | 0.51 | 0.65±0.2 | 0.53±0.3 | 0.75 | 0.77±0.1 | 0.57±0.3 | 0.01* | 0.63±0.1 | 0.58±0.2 | 0.53 | 0.50±0.3 | 0.60±0.3 | 0.28 |
| **p53 β/γ BCT** | 0.57±0.3 | 0.66±0.2 | 0.63 | 0.69±0.2 | 0.59±0.3 | 0.47 | 0.61±0.3 | 0.62±0.3 | 0.58 | 0.76±0.1 | 0.60±0.3 | 0.28 | 0.54±0.4 | 0.63±0.3 | 0.51 |

Statistical differences were evaluated using a Mann-Whitney U test. BMI= Body Mass Index; A= Haplogroup A; B= Haplogroup B; C= Haplogroup C; D= Haplogroup D; Non-NA = Non-Native American Haplogroups; P= P value; *P value < 0.05 is considered significant
