# Supplementary material for: Relationship between Δ40p53α, Δ133p53α, and p53β/γ isoforms and mitochondrial copy number, with clinical and pathological features in Mexican breast cancer patients
Source: Research Square preprint supplement (doi:10.21203/rs.3.rs-4259902/v1), 2024-04-29
Supplement: Supplementary file 5 [file c4a9284c00ad8561c080210a.docx]

**Table S4. Association of p53 protein isoforms with clinical and pathological features of breast cancer samples**

|  | **p53 isoforms** | | **Δ40p53α** | | | | **Δ133p53α** | | | | **p53β/γ** | | | |
| --- | --- | --- | --- | --- | --- | --- | --- | --- | --- | --- | --- | --- | --- | --- |
| **Clinical Feature** | **Frequency** | **Isoform status** | **BCT** | **NAT** | **OR (95% CI)** | **P** | **BCT** | **NAT** | **OR (95% CI)** | **P** | **BCT** | **NAT** | **OR (95% CI)** | **P** |
| **Age (%;n)** | <50  (27%; n=25) | Present  Absent | 12  13 | 14  11 | 0.56(0.24-2.21) | 0.57 | 13  12 | 11  14 | 1.37(0.45-4.20) | 0.57 | 14  11 | 9  16 | 2.26(0.73-7.04) | 0.16 |
| >50  (73%; n=66) | Present  Absent | 28  38 | 24  42 | 1.29(0.64-2.58) | 0.48 | 38  28 | 24  42 | 2.35(1.17-4.70) | 0.01* | 30  36 | 31  35 | 0.94(0.48-1.86) | 0.86 |
| **BMI**  **(%;n)** | Healthy weight  (14%; n=12) | Present  Absent | 3  9 | 6  6 | 0.33(0.06-1.77) | 0.20 | 7  5 | 8  4 | 0.70(0.14-3.49) | 0.67 | 5  7 | 7  5 | 0.51(0.10-2.48) | 0.41 |
| Overweight  (48%; n=42) | Present  Absent | 23  21 | 17  27 | 1.74(0.74-4.06) | 0.20 | 23  21 | 16  28 | 1.92(0.82-4.49) | 0.13 | 23  21 | 14  30 | 2.35(0.98-5.59) | 0.05 |
| Obese  (38%; n=37) | Present  Absent | 16  21 | 16  21 | 1.00(0.40-2.49) | 1.00 | 21  16 | 11  26 | 3.10(1.20-8.01) | 0.01* | 17  20 | 19  18 | 0.80(0.32-1.99) | 0.64 |
| **Histological Subtype (%;n)**  **Histological type (%;n)** | IDC I  (54%; n=48) | Present  Absent | 21  27 | 20  28 | 1.09(0.49-2.43) | 0.84 | 22  26 | 18  30 | 1.41(0.63-3.16) | 0.41 | 23  25 | 19  29 | 1.40(0.63-3.14) | 0.41 |
| IDC II  (9%; n=8) | Present  Absent | 4  4 | 1  7 | 7.00(0.57-86.32) | 0.10 | 4  4 | 2  6 | 5.00(0.58-42.79) | 0.13 | 3  5 | 2  6 | 1.80(0.21-15.40) | 0.59 |
| IDC III  (17%; n=16) | Present  Absent | 6  10 | 7  9 | 0.77(0.19-3.17) | 0.72 | 12  4 | 7  9 | 3.85(0.85-17.32) | 0.07 | 9  7 | 9  7 | 1.00(0.25-4.04) | 1.00 |
| ILC I  (17%; n=17) | Present  Absent | 8  9 | 10  7 | 0.62(0.16-2.36) | 0.49 | 10  7 | 7  10 | 2.04(0.53-7.80) | 0.30 | 9  8 | 10  7 | 0.79(0.21-2.98) | 0.73 |
| Other  (3%; n=2) | Present  Absent | 2  1 | 0  3 | 6.00(0.35-101.56) | 0.20 | 3  0 | 2  1 | 2.66(0.16-45.14) | 0.49 | 1  2 | 0  3 | 2.66(0.16-45.14) | 0.49 |
| **Breast Cancer Stage**  **(%;n)** | IA  (17.58%; n=16) | Present  Absent | 5  11 | 8  8 | 0.45(0.11-1.86) | 0.28 | 9  7 | 8  8 | 1.28(0.33-5.02) | 0.72 | 8  8 | 6  10 | 1.66(0.42-6.67) | 0.48 |
| IB  (6.59%; n=6) | Present  Absent | 3  3 | 2  4 | 2.00(0.22-17.89) | 0.55 | 3  3 | 2  4 | 2.00(0.22-17.89) | 0.55 | 3  3 | 3  3 | 1.00(0.13-8.64) | 1.00 |
| IIA  (21.99%; n=20) | Present  Absent | 9  11 | 9  11 | 1.00(0.29-3.31) | 1.00 | 11  9 | 9  11 | 1.49(0.44-5.09) | 0.53 | 10  10 | 10  10 | 1.00(0.29-3.39) | 1.00 |
| IIB  (14.28%; n=13) | Present  Absent | 5  8 | 5  8 | 1.00(0.21-4.64) | 1.00 | 7  6 | 3  10 | 3.88(0.76-19.58) | 0.10 | 5  8 | 5  8 | 1.00(0.21-4.64) | 1.00 |
| IIIA  (25.27%; n=23) | Present  Absent | 10  13 | 10  13 | 1.00(0.32-3.15) | 1.00 | 13  10 | 9  14 | 2.02(0.63-6.44) | 0.23 | 10  13 | 10  13 | 1.00(0.32-3.15) | 1.00 |
| IIIB  (4.40%; n=4) | Present  Absent | 1  3 | 1  3 | 1.00(0.04-24.54) | 1.00 | 1  3 | 1  3 | 1.00(0.04-24.54) | 1.00 | 1  3 | 1  3 | 1.00(0.04-24.54) | 1.00 |
| IIIC  (5.49%; n=5) | Present  Absent | 4  1 | 4  1 | 1.00(0.04-22.17) | 1.00 | 4  1 | 4  1 | 1.00(0.04-22.17) | 1.00 | 4  1 | 4  1 | 1.00(0.04-22.17) | 1.00 |
| IV  (4.40%; n=4) | Present  Absent | 3  1 | 3  1 | 1.00(0.04-24.55) | 1.00 | 3  1 | 3  1 | 1.00(0.04-24.55) | 1.00 | 3  1 | 3  1 | 1.00(0.04-24.55) | 1.00 |
| **Haplogroup**  **(%;n)** | A  (37.36%; n=34) | Present  Absent | 18  16 | 18  16 | 1.00(0.39-2.57) | 1.00 | 25  9 | 16  18 | 3.12(1.14-8.52) | 0.02* | 19  15 | 19  15 | 1.00(0.39-2.58) | 1.00 |
| B  (28.57%; n=26) | Present  Absent | 12  14 | 12  14 | 1.00(0.34-2.949 | 1.00 | 14  12 | 10  16 | 1.86(0.63-5.55) | 0.26 | 13  13 | 13  13 | 1.00(0.34-2.93) | 1.00 |
| C  (15.38%; n=14) | Present  Absent | 6  8 | 6  8 | 1.00(0.23-4.31) | 1.00 | 7  7 | 6  8 | 1.33(0.31-5.71) | 0.83 | 6  8 | 6  8 | 1.00(0.23-4.31) | 1.00 |
| D  (9.89%; n=9) | Present  Absent | 3  6 | 3  6 | 1.00(0.15-6.41) | 1.00 | 4  5 | 3  6 | 1.60(0.25-9.93) | 0.62 | 4  5 | 4  5 | 1.00(0.17-6.02) | 1.00 |
| Non-Native American  (8.79%; n=8) | Present  Absent | 3  5 | 2  6 | 1.80(0.24-13.11) | 0.59 | 3  5 | 2  6 | 1.80(0.24-13.11) | 0.59 | 3  5 | 3  5 | 1.00(0.15-6.86) | 1.00 |
| **ER (%;n)** | Positive  (83%; n=75) | Present  Absent | 33  42 | 30  45 | 1.18(0.62-2.25) | 0.61 | 41  34 | 27  48 | 2.14(1.12-4.11) | 0.02* | 38  37 | 31  44 | 1.46(0.77-2.77) | 0.25 |
| Negative  (17%; n=16) | Present  Absent | 6  10 | 8  8 | 0.60(0.15-2.45) | 0.48 | 9  7 | 7  9 | 1.65(0.41-6.68) | 0.48 | 5  11 | 8  8 | 0.45(0.11-1.92) | 0.28 |
| **PR (%;n)** | Positive  (77%; n=69) | Present  Absent | 30  39 | 28  41 | 1.13(0.57-2.21) | 0.73 | 38  31 | 28  41 | 1.79(0.92-3.51) | 0.08 | 36  33 | 30  39 | 1.42(0.73-2.76) | 0.31 |
| Negative  (23%; n=22) | Present  Absent | 9  13 | 11  11 | 0.69(0.21-2.24) | 0.54 | 11  11 | 8  14 | 1.75(0.53-5.73) | 0.36 | 7  15 | 11  11 | 0.47(0.14-1.56) | 0.22 |
| **HER2 (%;n)** | Positive  (8%; n=6) | Present  Absent | 1  5 | 3  3 | 0.20(0.04-2.91) | 0.22 | 5  1 | 4  2 | 2.50(0.22-25.976) | 0.50 | 4  2 | 4  2 | 1.00(0.11-9.18) | 1.00 |
| Negative  (92%; n=85) | Present  Absent | 39  46 | 34  51 | 1.27(0.69-2.33) | 0.44 | 47  38 | 34  51 | 1.85(1.01-3.41) | 0.04 | 41  44 | 36  49 | 1.27(0.69-2.32) | 0.44 |
| **Breast Cancer Subtypes**  **(%;n)** | Luminal A  (75.82%; n=69) | Present  Absent | 30  39 | 30  39 | 1.00(0.51-1.95) | 1.00 | 39  30 | 27  42 | 2.02(1.03-3.97) | 0.04* | 33  36 | 33  36 | 1.00(0.51-1.94) | 1.00 |
| Luminal B  (3.30%; n=3) | Present  Absent | 1  2 | 1  2 | 1.00(0.07-13.46) | 1.00 | 2  1 | 1  2 | 1.00(0.19-39.79) | 0.47 | 1  2 | 1  2 | 1.00(0.07-13.46) | 1.00 |
| TNBC  (13.19%; n=12) | Present  Absent | 6  6 | 5  7 | 1.40(0.29-6.72) | 0.68 | 6  6 | 4  8 | 2.00(0.40-9.89) | 0.40 | 6  6 | 6  6 | 1.00(0.21-4.76) | 1.00 |
| HER2+  (3.30%; n=3) | Present  Absent | 3  3 | 3  3 | 1.00(0.11-8.64) | 1.00 | 3  3 | 3  3 | 1.00(0.11-8.64) | 1.00 | 3  3 | 3  3 | 1.00(0.11-8.64) | 1.00 |
| HER3+  (4.39%; n=4) | Present  Absent | 2  2 | 2  2 | 1.00(0.07-13.29) | 1.00 | 3  1 | 2  2 | 3.00(0.15-59.88) | 0.46 | 2  2 | 2  2 | 1.00(0.07-13.29) | 1.00 |

Odds ratio analysis. BCT= Breast Cancer Tissue; NAT= Normal Adjacent Tissue; BMI= Body Mass Index; IDC= Invasive Ductal Carcinoma; ILC= Invasive Lobular Carcinoma; ER= Estrogen Receptor; PR= Progesterone Receptor; TNBC= Triple-Negative Breast Cancer; HER= Human Epidermal Growth Factor Receptor; P= P value. *P value < 0.05 is considered significant.
